# Supplementary material for: Genome-wide association meta-analysis identifies pleiotropic risk loci for aerodigestive squamous cell cancers
Source: PLoS Genet. 2021 Mar 5;17(3):e1009254. doi: 10.1371/journal.pgen.1009254 (PMC7968735; doi:10.1371/journal.pgen.1009254)
Supplement: S8 Table — Analyses performed with MAGMA with 18669 protein-coding genes. (XLSX) [file pgen.1009254.s017.xlsx]

## Sheet: Sheet1
S8 Table Significant results from the gene-baseda aerodigestive SqCC association analysis
EnsemblID	Symbol	Region	Location	NSNPs	P-value	adjPb	Zstat	Nparam	N
ENSG00000066135	KDM4A	1p34.1	1:44115829-44171186	89	1.5135e-07	0.00282555	5.1218	16	74396
ENSG00000198625	MDM4	1q32.1	1:204485511-204542871	182	5.1809e-07	0.00967222	4.8846	20	73038
ENSG00000170382	LRRN2	1q32.1	1:204586298-204654861	218	1.7624e-06	0.0329022	4.6376	35	74296
ENSG00000155755	TMEM237	2q33.1	2:202484907-202508293	47	3.0901e-07	0.00576891	4.9855	17	72533
ENSG00000049656	CLPTM1L	5p15.33	5:1317859-1345214	89	2.1673e-10	4.04613e-06	6.2415	15	74864
ENSG00000269071	AC138517.1	5q31.2	5:138852108-138852506	1	3.4842e-07	0.00650465	4.9622	1	76348
ENSG00000124568	SLC17A1	6p22.2	6:25783125-25832287	169	1.199e-07	0.00223841	5.1655	21	74594
ENSG00000124564	SLC17A3	6p22.2	6:25833294-25882514	153	1.713e-08	0.0003198	5.5181	22	74683
ENSG00000112337	SLC17A2	6p22.2	6:25912982-25930946	73	3.9868e-09	7.44296e-05	5.769	13	74280
ENSG00000112343	TRIM38	6p22.2	6:25963030-25987384	73	1.8749e-10	3.50025e-06	6.2641	22	72413
ENSG00000196176	HIST1H4A	6p22.2	6:26021907-26022278	2	1.5464e-07	0.00288697	5.1177	1	71630
ENSG00000196532	HIST1H3C	6p22.2	6:26045639-26046097	3	3.0879e-07	0.0057648	4.9856	2	76348
ENSG00000010704	HFE	6p22.2	6:26087509-26098571	36	5.8263e-08	0.00108771	5.2989	14	73989
ENSG00000180596	HIST1H2BC	6p22.2	6:26115101-26124154	39	7.1425e-07	0.0133343	4.821	10	73687
ENSG00000158373	HIST1H2BD	6p22.2	6:26158349-26171577	22	5.3133e-07	0.0099194	4.8797	8	74028
ENSG00000197697	HIST1H2BE	6p22.2	6:26183958-26184454	2	9.3985e-07	0.0175461	4.7659	1	76348
ENSG00000197846	HIST1H2BF	6p22.2	6:26199748-26200942	11	2.3434e-08	0.000437489	5.4628	5	75461
ENSG00000158406	HIST1H4H	6p22.2	6:26281283-26285762	20	1.4166e-09	2.64465e-05	5.941	8	73045
ENSG00000185130	HIST1H2BL	6p22.1	6:27775257-27775709	2	4.6707e-08	0.000871973	5.3391	1	76348
ENSG00000182611	HIST1H2AJ	6p22.1	6:27782112-27782607	4	2.058e-08	0.000384208	5.4858	2	73989
ENSG00000233822	HIST1H2BN	6p22.1	6:27806323-27823487	39	2.9939e-11	5.58931e-07	6.544	10	73185
ENSG00000184357	HIST1H1B	6p22.1	6:27834570-27835359	7	5.0786e-09	9.48124e-05	5.7281	4	72304
ENSG00000198558	HIST1H4L	6p22.1	6:27840926-27841289	2	1.3441e-07	0.0025093	5.1441	1	71630
ENSG00000168131	OR2B2	6p22.1	6:27878963-27880174	4	2.158e-09	4.02877e-05	5.8716	2	76348
ENSG00000137185	ZSCAN9	6p22.1	6:28192664-28201260	35	7.4599e-07	0.0139269	4.8123	11	74730
ENSG00000187626	ZKSCAN4	6p22.1	6:28212401-28227011	39	3.4592e-10	6.45798e-06	6.1679	13	73104
ENSG00000137338	PGBD1	6p22.1	6:28249314-28270326	75	7.2477e-08	0.00135307	5.2589	18	73958
ENSG00000235109	ZSCAN31	6p22.1	6:28292470-28324048	129	3.3577e-08	0.000626849	5.3986	22	74674
ENSG00000189298	ZKSCAN3	6p22.1	6:28317691-28336947	76	2.5391e-08	0.000474025	5.4486	16	74881
ENSG00000158691	ZSCAN12	6p22.1	6:28346732-28367511	74	1.4534e-08	0.000271335	5.547	12	75583
ENSG00000156170	NDUFAF6	8q22.1	8:95907995-96128683	691	1.2424e-06	0.0231944	4.7094	40	75392
ENSG00000060237	WNK1	12p13.33	12:861759-1020618	379	8.3728e-09	0.000156312	5.6426	30	75242
ENSG00000002016	RAD52	12p13.33	12:1021243-1099219	248	2.4505e-13	4.57484e-09	7.228	46	75467
ENSG00000111206	FOXM1	12p13.33	12:2966847-2986206	37	2.5325e-06	0.0472792	4.5621	12	74308
ENSG00000089234	BRAP	12q24.12	12:112079950-112123790	49	1.2355e-07	0.00230655	5.1599	12	73445
ENSG00000168781	PPIP5K1	15q15.3	15:43825660-43882430	41	8.979e-07	0.0167629	4.7751	10	72896
ENSG00000242866	STRC	15q15.3	15:43891596-44010458	124	4.4364e-07	0.00828232	4.9151	16	74293
ENSG00000166762	CATSPER2	15q15.3	15:43920701-43960316	62	4.5824e-07	0.00855488	4.9088	11	74522
ENSG00000136381	IREB2	15q25.1	15:78729773-78793798	146	1.5315e-19	2.85916e-15	8.9664	17	75105
ENSG00000188266	HYKK	15q25.1	15:78799906-78829714	87	1.579e-13	2.94784e-09	7.2875	9	74179
ENSG00000041357	PSMA4	15q25.1	15:78832747-78841604	41	4.7266e-11	8.82409e-07	6.4754	9	74183
ENSG00000169684	CHRNA5	15q25.1	15:78857862-78887611	91	3.5634e-19	6.65251e-15	8.8729	14	73022
ENSG00000080644	CHRNA3	15q25.1	15:78885394-78913637	82	2.1714e-22	4.05379e-18	9.6627	12	74106
ENSG00000117971	CHRNB4	15q25.1	15:78916461-79020096	260	1.0702e-17	1.99796e-13	8.4859	27	75248
ENSG00000136378	ADAMTS7	15q25.1	15:79051545-79103773	147	3.2608e-11	6.08759e-07	6.5313	14	75616
ENSG00000130307	USHBP1	19p13.11	19:17359985-17393595	120	2.494e-06	0.0465605	4.5653	22	74697
ENSG00000105393	BABAM1	19p13.11	19:17378159-17392058	52	8.7776e-08	0.00163869	5.2235	11	74533
ENSG00000269307	CTD-2278I10.6	19p13.11	19:17378227-17393775	59	9.0544e-08	0.00169037	5.2178	11	74749
ENSG00000268797	CTC-490E21.12	19q13.2	19:41307202-41404187	334	1.2595e-09	2.35136e-05	5.9602	40	75811
ENSG00000183765	CHEK2	22q12.1	22:29083731-29138410	149	5.3074e-07	0.00990839	4.8799	26	74826
ENSG00000100219	XBP1	22q12.1	22:29190543-29196585	8	1.8766e-06	0.0350342	4.6246	4	73989
aAnalyses performed with MAGMA with 18669 protein-coding genes
bBonferroni adjusted
